# Supplementary material
Source: Springer Nature journal article supplement (https://www.springermedizin.de/resource/supplementary/12891_2009_731_MOESM2_ESM.pdf/9506284)
Supplement: MOESM2 [file 9506284]

Population sample aged 35 and above, N=28 080

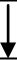

Screening Questionnaire 1993-95  
N = 26 046

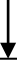

Responded  
N = 22 978 (88%)

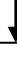

Hip and/or knee pain,  
N=6 416 (28%)

Knee pain  
n = 4 799 (21%)

Hip pain  
n = 3 169 (14%)

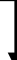

Invited to examination at baseline,  
N=4 304

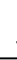

Examined at baseline, N=2 703

Deceased, n=439  
Emigrated, n=1  
Advised by GP no contact, n=29  
Not willing to participate in further examinations, n=30

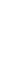

Contacted 2002/2003, N=2 204

Deceased, n=58  
Not willing or ill health, n=437  
Emigrated, n=2  
Non-respondents, n=348

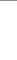

Respondents follow-up, N= 1359

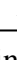

Completed pain questionnaires,  
N=1323

No current pain in hip or knee, n=139

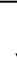

Completed health care utilization  
questionnaires, N=1119  
**Current study population**
